# Supplementary material
Source: PubMed Central journal article supplement (PMC2575491)
Supplement: 0807225105_0807225105SI.pdf [file 0807225105_0807225105SI.pdf]

|            |                                                                                                                                                                                                                                                                                                                                                                                                                          |      |
|------------|--------------------------------------------------------------------------------------------------------------------------------------------------------------------------------------------------------------------------------------------------------------------------------------------------------------------------------------------------------------------------------------------------------------------------|------|
| 713 defect | CT---GCTGGGTTTCGCAGCAGGTGGCACGGTGCACATGGAAGTGATAGACGAAGAGCACGTTGAGGAAAAGCCTTCGGT                                                                                                                                                                                                                                                                                                                                         | 6222 |
| Majority   | TGCTGGTCAGTCAGAGCCAGCCGCCGAAATCGACAATGACAAAATTTCTGACTATGACCAAGAATGGTGGGGGAGTCAAG<br>-----+-----+-----+-----+-----+-----+-----+<br>6650 6660 6670 6680 6690 6700 6710 6720<br>-----+-----+-----+-----+-----+-----+-----+<br>713 TGCTGGTCAGTCAGAGCCAGCCGCCGAAATCGACAATGACAAAATTTCTGACTATGACCAAGAATGGTGGGGGAGTCAAG 6720<br>713 defect TGCTGGTCAGTCAGAGCCAGCCGCCGAAATCGACAATGACAAAATTTCTGACTATGACCAAGAATGGTGGGGGAGTCAAG 6302 |      |
| Majority   | ACAGTATTGACACAGTGGTTAACGACCTGTGTTACTTGTGTCTTCCTGAAAGATACGGCGATCCCTGAAGAGGTCAAA<br>-----+-----+-----+-----+-----+-----+-----+<br>6730 6740 6750 6760 6770 6780 6790 6800<br>-----+-----+-----+-----+-----+-----+-----+<br>713 ACAGTATTGACACAGTGGTTAACGACCTGTGTTACTTGTGTCTTCCTGAAAGATACGGCGATCCCTGAAGAGGTCAAA 6800<br>713 defect ACAGTATTGACACAGTGGTTAACGACCTGTGTTACTTGTGTCTTCCTGAAAGATACGGCGATCCCTGAAGAGGTCAAA 6382       |      |
| Majority   | CTCGATGTAGTCGAACTGGCTTACTCCCAGCTTGTTCCAGGACGAAAAGGAACGCATACCAGAACCGAAGGAACTAAGAT<br>-----+-----+-----+-----+-----+-----+-----+<br>6810 6820 6830 6840 6850 6860 6870 6880<br>-----+-----+-----+-----+-----+-----+-----+<br>713 CTCGATGTAGTCGAACTGGCTTACTCCCAGCTTGTTCCAGGACGAAAAGGAACGCATACCAGAACCGAAGGAACTAAGAT 6880<br>713 defect CTCGATGTAGTCGAACTGGCTTACTCCCAGCTTGTTCCAGGACGAAAAGGAACGCATACCAGAACCGAAGGAACTAAGAT 6407 |      |
| Majority   | TCTGGACATGCCGAATTGGAAGCCTGGCAACTGGGCCAAGTTAATAGTCGAGACGCATCGGGTGTCTCCAGTTTACTC<br>-----+-----+-----+-----+-----+-----+-----+<br>6890 6900 6910 6920 6930 6940 6950 6960<br>-----+-----+-----+-----+-----+-----+-----+<br>713 TCTGGACATGCCGAATTGGAAGCCTGGCAACTGGGCCAAGTTAATAGTCGAGACGCATCGGGTGTCTCCAGTTTACTC 6960<br>713 defect TCTGGACATGCCGAATTGGAAGCCTGGCAACTGGGCCAAGTTAATAA---GAGACGCATCGGGTGTCTCCAGTTTACTC 6443      |      |
| Majority   | AATATACCCGCGAGTTCTCAACGAACTCGTCGTGTGGTTGAAAGGACTAGGGGAGAACCCTCTATAGGGTCGCTGAACCC<br>-----+-----+-----+-----+-----+-----+-----+<br>6970 6980 6990 7000 7010 7020 7030 7040<br>-----+-----+-----+-----+-----+-----+-----+<br>713 AATATACCCGCGAGTTCTCAACGAACTCGTCGTGTGGTTGAAAGGACTAGGGGAGAACCCTCTATAGGGTCGCTGAACCC 7040<br>713 defect AATATACCCGCGAGTTCTCAACGAACTCGTCGTGTGGTTGAAAGGACTAGGGGAGAACCCTCTATAGGGTCGCTGAACCC 6523 |      |
| Majority   | ATTCTTATGCTATTAGTACGTGCGATGAGAGCTGCCAAATCCGTGAGTGATCGTGCCACACGTTCCGTATATCACTGCCT<br>-----+-----+-----+-----+-----+-----+-----+<br>7050 7060 7070 7080 7090 7100 7110 7120<br>-----+-----+-----+-----+-----+-----+-----+<br>713 ATTCTTATGCTATTAGTACGTGCGATGAGAGCTGCCAAATCCGTGAGTGATCGTGCCACACGTTCCGTATATCACTGCCT 7120<br>713 defect ATTCTTATGCTATTAGTACGTGCGATGAGAGCTGCCAAATCCGTGAGTGATCGTGCCACACGTTCCGTATATCACTGCCT 6603 |      |
| Majority   | CTGCCATTGGCTAGACGTGATGTATGGCGGCTCCGCCCTACCAGGGTGAAGACCGTGTGGGGACTCACAGGCTTGGTGG<br>-----+-----+-----+-----+-----+-----+-----+<br>7130 7140 7150 7160 7170 7180 7190 7200<br>-----+-----+-----+-----+-----+-----+-----+<br>713 CTGCCATTGGCTAGACGTGATGTATGGCGGCTCCGCCCTACCAGGGTGAAGACCGTGTGGGGACTCACAGGCTTGGTGG 7200<br>713 defect CTGCCATTGGCTAGACGTGATGTATGGCGGCTCCGCCCTACCAGGGTGAAGACCGTGTGGGGACTCACAGGCTTGGTGG 6683    |      |
| Majority   | CTTCTGGCATGACCAGTCAGAAAGCCATACTCGCTCAGAACATAGCAATGATGGAATACCAGGGCAGAGGGAATTTCCCT<br>-----+-----+-----+-----+-----+-----+-----+<br>7210 7220 7230 7240 7250 7260 7270 7280<br>-----+-----+-----+-----+-----+-----+-----+<br>713 CTTCTGGCATGACCAGTCAGAAAGCCATACTCGCTCAGAACATAGCAATGATGGAATACCAGGGCAGAGGGAATTTCCCT 7280<br>713 defect CTTCTGGCATGACCAGTCAGAAAGCCATACTCGCTCAGAACATAGCAATGATGGAATACCAGGGCAGAGGGAATTTCCCT 6763 |      |
| Majority   | GATGATTATGACAACTTTGTCTCCAACATCAAGGAACCCGGGAAGGACTACCTGGTATAAACACCATCGGAGGGCCACA<br>-----+-----+-----+-----+-----+-----+-----+<br>7290 7300 7310 7320 7330 7340 7350 7360<br>-----+-----+-----+-----+-----+-----+-----+<br>713 GATGATTATGACAACTTTGTCTCCAACATCAAGGAACCCGGGAAGGACTACCTGGTATAAACACCATCGGAGGGCCACA 7360<br>713 defect GATGATTATGACAACTTTGTCTCCAACATCAAGGAACCCGGGAAGGACTACCTGGTATAAACACC----- 6829             |      |
| Majority   | ACGACGTCGATTCGATACAAGAACCCTGTCATGTCTCACCAGGCTGCCGAAATCTGTGGATTGAAGCCTGGGGAGTATG<br>-----+-----+-----+-----+-----+-----+-----+<br>7370 7380 7390 7400 7410 7420 7430 7440<br>-----+-----+-----+-----+-----+-----+-----+<br>713 ACGACGTCGATTCGATACAAGAACCCTGTCATGTCTCACCAGGCTGCCGAAATCTGTGGATTGAAGCCTGGGGAGTATG 7440<br>713 defect ACGACGTCGATTCGATACAAGAACCCTGTCATGTCTCACCAGGCTGCCGAAATCTGTGGATTGAAGCCTGGGGAGTATG 6829    |      |
| Majority   | AAGTGATGATAGGTATCAGGAAAGGATAAACCATTACCTTGCGGAAGGGATCCCGCAGGCAGTCGATGGCGTCTCTTT                                                                                                                                                                                                                                                                                                                                           |      |







|            |                                                                                                                                                                                                                                               |               |
|------------|-----------------------------------------------------------------------------------------------------------------------------------------------------------------------------------------------------------------------------------------------|---------------|
| 713        | -----+-----+-----+-----+-----+-----+-----+-----+<br>CAGTCACTGTTCTTGATAGGGCCATTATATAATCTATTCATGTGGTCTGTTCTGGGGATTGTCAAAGTCTACGGACTGGC<br>-----                                                                                                 | 10000<br>6829 |
| 713 defect | -----                                                                                                                                                                                                                                         |               |
| Majority   | GAACACGTTTTATTGGCATGGTAAAGCCCGCTCGAGCAGAGAAATCAGCTCGATCCTGCCAAGAGACCCATAACATGTGGT<br>-----+-----+-----+-----+-----+-----+-----+-----+<br>10010 10020 10030 10040 10050 10060 10070 10080<br>-----+-----+-----+-----+-----+-----+-----+-----+  |               |
| 713        | GAACACGTTTTATTGGCATGGTAAAGCCCGCTCGAGCAGAGAAATCAGCTCGATCCTGCCAAGAGACCCATAACATGTGGT<br>-----                                                                                                                                                    | 10080<br>6829 |
| 713 defect | -----                                                                                                                                                                                                                                         |               |
| Majority   | CTAAACGTTTCGTCAGCAGCATGGCTGATTTTCATCCCTGAACGATTTGCTCTCGGTATCGTTCGCCGTGACCTTGGTCTTG<br>-----+-----+-----+-----+-----+-----+-----+-----+<br>10090 10100 10110 10120 10130 10140 10150 10160<br>-----+-----+-----+-----+-----+-----+-----+-----+ |               |
| 713        | CTAAACGTTTCGTCAGCAGCATGGCTGATTTTCATCCCTGAACGATTTGCTCTCGGTATCGTTCGCCGTGACCTTGGTCTTG<br>-----                                                                                                                                                   | 10160<br>6829 |
| 713 defect | -----                                                                                                                                                                                                                                         |               |
| Majority   | GATGGTCTCGCCGAGATCATCGAAGTTCTATTTGGGCGCATGTGGAGACTGTTTGCGAATCTGAAATCGGTAGGCACCGA<br>-----+-----+-----+-----+-----+-----+-----+-----+<br>10170 10180 10190 10200 10210 10220 10230 10240<br>-----+-----+-----+-----+-----+-----+-----+-----+   |               |
| 713        | GATGGTCTCGCCGAGATCATCGAAGTTCTATTTGGGCGCATGTGGAGACTGTTTGCGAATCTGAAATCGGTAGGCACCGA<br>-----                                                                                                                                                     | 10240<br>6829 |
| 713 defect | -----                                                                                                                                                                                                                                         |               |
| Majority   | CTTCAGTGACGCACGATCTGGCAAATCGTTAAATGTGCCGTCCAATCCTTGGGCCGCGTACGCCACACGTACGCAACAA<br>-----+-----+-----+-----+-----+-----+-----+-----+<br>10250 10260 10270 10280 10290 10300 10310 10320<br>-----+-----+-----+-----+-----+-----+-----+-----+    |               |
| 713        | CTTCAGTGACGCACGATCTGGCAAATCGTTAAATGTGCCGTCCAATCCTTGGGCCGCGTACGCCACACGTACGCAACAA<br>-----                                                                                                                                                      | 10320<br>6829 |
| 713 defect | -----                                                                                                                                                                                                                                         |               |
| Majority   | AAGCCATCGAGCAGGTCACGTTACTGTAGCCGAAAAACCGCTTCCGGTAAGTCCACTTCTTCCCGCAGCGGTGTTG<br>-----+-----+-----+-----+-----+-----+-----+-----+<br>10330 10340 10350 10360 10370 10380 10390 10400<br>-----+-----+-----+-----+-----+-----+-----+-----+       |               |
| 713        | AAGCCATCGAGCAGGTCACGTTACTGTAGCCGAAAAACCGCTTCCGGTAAGTCCACTTCTTCCCGCAGCGGTGTTG<br>-----                                                                                                                                                         | 10400<br>6829 |
| 713 defect | -----                                                                                                                                                                                                                                         |               |
| Majority   | GCGGAGAGGAGGAACATCGGAATCAAGAACTGTGGATCGTTATGCCAAGGAAGATCCTCCGCGATAACTGGGAGATTCC<br>-----+-----+-----+-----+-----+-----+-----+-----+<br>10410 10420 10430 10440 10450 10460 10470 10480<br>-----+-----+-----+-----+-----+-----+-----+-----+    |               |
| 713        | GCGGAGAGGAGGAACATCGGAATCAAGAACTGTGGATCGTTATGCCAAGGAAGATCCTCCGCGATAACTGGGAGATTCC<br>-----                                                                                                                                                      | 10480<br>6829 |
| 713 defect | -----                                                                                                                                                                                                                                         |               |
| Majority   | ATTTGACATCCGATCTCAAATCGTGAACGGGGAAAAACACTAGACCCATCGGCCGATATCTACGTGACCACGTACGGAC<br>-----+-----+-----+-----+-----+-----+-----+-----+<br>10490 10500 10510 10520 10530 10540 10550 10560<br>-----+-----+-----+-----+-----+-----+-----+-----+    |               |
| 713        | ATTTGACATCCGATCTCAAATCGTGAACGGGGAAAAACACTAGACCCATCGGCCGATATCTACGTGACCACGTACGGAC<br>-----                                                                                                                                                      | 10560<br>6829 |
| 713 defect | -----                                                                                                                                                                                                                                         |               |
| Majority   | ATTTCCGAACGAGGATAGGTGGACTGGTCCCGAGGGACAACCTGGTGTCTTCGATGAGTTTCACGAAATGGACGGTTTC<br>-----+-----+-----+-----+-----+-----+-----+-----+<br>10570 10580 10590 10600 10610 10620 10630 10640<br>-----+-----+-----+-----+-----+-----+-----+-----+    |               |
| 713        | ATTTCCGAACGAGGATAGGTGGACTGGTCCCGAGGGACAACCTGGTGTCTTCGATGAGTTTCACGAAATGGACGGTTTC<br>-----                                                                                                                                                      | 10640<br>6829 |
| 713 defect | -----                                                                                                                                                                                                                                         |               |
| Majority   | ATGCTACAGGACGTGGAAGACTGGAAAGGACCAACCATCTTCATGAGTGCAACTCCTGTTGCACTTCATGGAATGGCCGG<br>-----+-----+-----+-----+-----+-----+-----+-----+<br>10650 10660 10670 10680 10690 10700 10710 10720<br>-----+-----+-----+-----+-----+-----+-----+-----+   |               |
| 713        | ATGCTACAGGACGTGGAAGACTGGAAAGGACCAACCATCTTCATGAGTGCAACTCCTGTTGCACTTCATGGAATGGCCGG<br>-----                                                                                                                                                     | 10720<br>6829 |
| 713 defect | -----                                                                                                                                                                                                                                         |               |
| Majority   | CATCCCTTTCTTGAGCCAACACTGCCAAAGCGTTTCAATCTTACCGTTTACAAGTTGATTCCGATGACGTGTTGGAAA<br>-----+-----+-----+-----+-----+-----+-----+-----+<br>10730 10740 10750 10760 10770 10780 10790 10800<br>-----+-----+-----+-----+-----+-----+-----+-----+     |               |
| 713        | CATCCCTTTCTTGAGCCAACACTGCCAAAGCGTTTCAATCTTACCGTTTACAAGTTGATTCCGATGACGTGTTGGAAA<br>-----                                                                                                                                                       | 10800<br>6829 |
| 713 defect | -----                                                                                                                                                                                                                                         |               |





713 defect CATGTTCAAGAAATGGGCGAAAAGGGTTGCCCGAAAAGTATGGGCTACGCGCTTCGTTGTAAAGCTACCCATACAAAACCC 7844

Majority TTCGGCGCACTCACAACCTGAAATGTTAGTGTTTTCAACATCTCAGGAGTTTTAGTGTTACCGTCCTGCGCAAGCAAAGATG  
-----+-----+-----+-----+-----+-----+-----+-----+  
12490 12500 12510 12520 12530 12540 12550 12560  
-----+-----+-----+-----+-----+-----+-----+-----+

713 TTCGGCGCACTCACAACCTGAAATGTTAGTGTTTTCAACATCTCAGGAGTTTTAGTGTTACCGTCCTGCGCAAGCAAAGATG 12560  
713 defect TTCGGCGCACTCACAACCTGAAATGTTAGTGTTTTCAACATCTCAGGAGTTTTAGTGTTACCGTCCTGCGCAAGCAAAGATG 7924

Majority AGAACTATACCTTTGACAACAAAGGGTATAGGGATCGGAAAGGCCGCTGCAGTAGGATTCAGACAAATAAATTTTCTCTT  
-----+-----+-----+-----+-----+-----+-----+-----+  
12570 12580 12590 12600 12610 12620 12630 12640  
-----+-----+-----+-----+-----+-----+-----+-----+

713 AGAACTATACCTTTGACAACAAAGGGTATAGGGATCGGAAAGGCCGCTGCAGTAGGATTCAGACAAATAAATTTTCTCTT 12640  
713 defect AGAACTATACCTTTGACAACAAAGGGTATAGGGATCGGAAAGGCCGCTGCAGTAGGATTCAGACAAATAAATTTTCTCTT 8004

Majority GAAAATGTCCGCCGTTTTCTTTTGTGGCTATTCCTTTACCGTGCGTACGGTGGGAAGAGAACAACAAGAAAAAAAA  
-----+-----+-----+-----+-----+-----+-----+-----+  
12650 12660 12670 12680 12690 12700 12710 12720  
-----+-----+-----+-----+-----+-----+-----+-----+

713 GAAAATGTCCGCCGTTTTCTTTTGTGGCTATTCCTTTACCGTGCGTACGGTGGGAAGAGAACAACAAGAAAAAAAA 12720  
713 defect GAAAATGTCCGCCGTTTTCTTTTGTGGCTATTCCTTTACCGTGCGTACGGTGGGAAGAGAACAACAAGAAAAAAAA 8084

Majority AAAAAAAAAAAAAA  
-----+-----  
12730  
-----+-----

713 AAAAAAAAAAAAAA 12734  
713 defect AAAAAAAAAAAAAA 8098



**Table S1. Primers for defective RNA cDNA cloning and sequencing**

| Name*       | Sequence <sup>†</sup>               | CHV1-EP713 genome map coordinates |
|-------------|-------------------------------------|-----------------------------------|
| CHV1-F      | GGATCCGCGGCCGCGCCTATGGGTGGTCTACA    | 1–18                              |
| CHV1-R      | GGATCCGCGGCCGCTTTGTTGTTCTCTCCC      | 12712–12699                       |
| CHV1–0.5kR  | GGATCCGCGGCCGCTGGGTTTTCTTAATTGA     | 518–501                           |
| CHV1–1kF    | GGATCCGCGGCCGCATCTCTCGGCCATTGTAG    | 983–1000                          |
| CHV1–1kR    | GGATCCGCGGCCGCTTACTACAATGGCCGAGAGAT | 1000–983                          |
| CHV1–2kF    | GGATCCGCGGCCGCCACGACCCGGTTGAGGTC    | 1983–2000                         |
| CHV1–2kR    | GGATCCGCGGCCGCGACCTCAACCGGGTCGTG    | 2000–1983                         |
| CHV1–3kF    | GGATCCGCGGCCGCGAAATGGATCTATGGTC     | 2993–3000                         |
| CHV1–3kR    | GGATCCGCGGCCGCGACCATAGATCCATTTC     | 3000–2993                         |
| CHV1–4kF    | GGATCCGCGGCCGCCCTCCGCGATTGTGGGA     | 3993–4000                         |
| CHV1–4kR    | GGATCCGCGGCCGCTCCACAAATCGCGGAGG     | 4000–3993                         |
| CHV1–4.5F   | GGATCCGCGGCCGCATGTGAGAGTGTATCCCC    | 4483–4500                         |
| CHV1–5kF    | GGATCCGCGGCCGCTCCACGCTCTTGATCCCC    | 4983–5000                         |
| CHV1–5kR    | GGATCCGCGGCCCGGGATCAAGAGCGTGGA      | 5000–4983                         |
| CHV1–5.5kR  | GGATCCGCGGCCGCTCCTTAGGCACCACAGCT    | 5518–5501                         |
| CHV1–6kF    | GGATCCGCGGCCGCTAATGCTGAAGGCGCTGT    | 5983–6000                         |
| CHV1–6kR    | GGATCCGCGGCCGCACAGCGCCTTCAGCATT     | 6000–5983                         |
| CHV1–6.5F   | GGATCCGCGGCCCGGGCCTCCTCAAGCCGCG     | 6483–6500                         |
| CHV1–7kF    | GGATCCGCGGCCCGCAACTCGTGTGGTT        | 6983–7000                         |
| CHV1–7kR    | GGATCCGCGGCCCAACCACAGACGAGTTCCG     | 7000–6983                         |
| CHV1–11kF   | GGATCCGCGGCCGCTGTGCACGCCATATGTA     | 10983–11000                       |
| CHV1–11kR   | GGATCCGCGGCCGCTACATATGGCGTGACAC     | 11000–10983                       |
| CHV1–11.7kF | GGATCCGCGGCCGAGGTAATTCTACACCAGC     | 11683–11700                       |
| CHV1–11.7kR | GGATCCGCGGCCCGGATCTCTGCATGTTCCC     | 11701–11718                       |
| CHV1–12kF   | GGATCCGCGGCCGAGTAAAGACGTTAACCCG     | 11983–12000                       |
| CHV1–12kR   | GGATCCGCGGCCCGGGTTAACGTCCTTACT      | 12000–11983                       |
| CHV1–12.5F  | GGATCCGCGGCCCGGGCGCACTCAAACTGA      | 12483–12500                       |
| CHV1–12.5R  | GGATCCGCGGCCGCTCAGTTGTGAGTGCGCCG    | 12500–12483                       |

\*F, forward orientation; R, reverse orientation.

<sup>†</sup>GGATCC and GCGGCCG are BamHI and Not I restriction sites designed for cloning purposes.
